# Supplementary material for: Adequacy of Some Locally Produced Complementary Foods Marketed in Benin, Burkina Faso, Ghana, and Senegal
Source: MDPI journal article supplement (doi:10.3390/nu10060785), 2018-06-18
Supplement: s1 [file s1]

**Table S1.** Basic ingredients used in the 32 collected samples of PCBBs.

| Country of origin              | PCBB commercial name             | Flour type <sup>a</sup> | Basic ingredients          |                            |                                                                     | Process used to increase energy density | VM Premix <sup>a</sup> |
|--------------------------------|----------------------------------|-------------------------|----------------------------|----------------------------|---------------------------------------------------------------------|-----------------------------------------|------------------------|
|                                |                                  |                         | Carbohydrate source        | Oleaginous & Legumes       | Other                                                               |                                         |                        |
| <i>Locally processed PCBBs</i> |                                  |                         |                            |                            |                                                                     |                                         |                        |
| Benin                          | Beau bébé (1st age)              | C                       | maize, rice                | soybean germ               | sugar, fat                                                          | malted cereals                          | yes                    |
|                                | Beau bébé (2nd age)              | C                       | maize, rice, tubers        | soybean                    | sugar, fat                                                          | none                                    | yes                    |
|                                | Céréso Ouando                    | I                       | maize, sorghum             | soybean                    | sugar                                                               | extrusion cooking                       | yes                    |
|                                | Délices Familia                  | C                       | maize, millet              | –                          | salt                                                                | none                                    | no                     |
|                                | La famille (1st age)             | C                       | maize, millet              | –                          | milk, sugar, vanilla                                                | none                                    | yes                    |
|                                | La famille (2nd age)             | C                       | maize, millet, sorghum     | soybean                    | milk, sugar, vanilla                                                | none                                    | yes                    |
|                                | Médivit (from 3 mo)              | C                       | maize, millet, rice, fonio | soybean                    | –                                                                   | none                                    | no                     |
|                                | Mickelange (2 <sup>nd</sup> age) | I                       | maize, millet, cassava     | –                          | milk, egg, sugar, salt                                              | extrusion cooking                       | yes                    |
| Burkina Faso                   | Céréalor                         | C                       | yellow maize               | groundnut, soybean         | milk, sugar, iodized salt                                           | industrial amylase                      | yes                    |
|                                | Misola                           | C                       | millet                     | groundnut, soybean         | sugar, iodized salt                                                 | industrial amylase                      | yes                    |
|                                | Natavie                          | C                       | millet, sorghum            | groundnut, soybean         | sugar, iodized salt, baobab fruit                                   | industrial amylase                      | yes                    |
|                                | Petit Gourmet                    | C                       | white maize                | groundnut, soybean, sesame | sugar, iodized salt                                                 | industrial amylase                      | yes                    |
|                                | Vitaline biscuitée               | C                       | maize, wheat               | groundnut                  | milk, sugar, bicarbonate sodium, citric acid, dipotassium phosphate | none                                    | yes                    |
|                                | Vitaline Instantanée             | I                       | maize                      | groundnut                  | milk, sugar                                                         | extrusion cooking                       | yes                    |
|                                | Vitazom                          | C                       | white maize                | groundnut, soybean, cowpea | sugar, iodized salt, vanillin                                       | industrial amylase                      | yes                    |
|                                | Ghana                            | Best one special TB     | C                          | rice, wheat                | soybean                                                             | –                                       | none                   |

| Country of origin                                                             | PCBB commercial name           | Flour type <sup>a</sup> | Basic ingredients                      |                                    |                                                                           | Process used to increase energy density | VM Premix <sup>a</sup> |
|-------------------------------------------------------------------------------|--------------------------------|-------------------------|----------------------------------------|------------------------------------|---------------------------------------------------------------------------|-----------------------------------------|------------------------|
|                                                                               |                                |                         | Carbohydrate source                    | Oleaginous & Legumes               | Other                                                                     |                                         |                        |
|                                                                               | Crossover – millet & wheat TB  | C                       | millet, wheat                          | groundnut, soybean                 | sugar                                                                     | none                                    | no                     |
|                                                                               | Crossover – wheat & soybean TB | C                       | wheat                                  | soybean                            | sugar                                                                     | none                                    | no                     |
|                                                                               | Homefresh Haussa koko          | C                       | millet, sorghum                        | –                                  | spices                                                                    | none                                    | no                     |
|                                                                               | Nacem TB                       | C                       | maize                                  | groundnut, soybean                 | –                                                                         | none                                    | no                     |
|                                                                               | Nutritious sesame              | C                       | maize, millet                          | groundnut, soybean, sesame, seeds, | flax –                                                                    | none                                    | no                     |
|                                                                               | Oatmeal superb taste           | C                       | millet, sorghum, oat                   | soybean                            | –                                                                         | none                                    | no                     |
|                                                                               | Renny Tom cereal legume mix    | C                       | rice, wheat                            | groundnut, soybean, beans          | –                                                                         | none                                    | no                     |
|                                                                               | Vidamix - maize                | C                       | maize                                  | groundnut, soybean                 | –                                                                         | none                                    | no                     |
|                                                                               | Vidamix - millet               | C                       | millet                                 | groundnut, soybean                 | –                                                                         | none                                    | no                     |
| Senegal                                                                       | Sembo                          | C                       | maize, millet, rice                    | groundnut, cowpea                  |                                                                           | none                                    | no                     |
|                                                                               | Sembo Lakhou Pissa             | C                       | millet                                 | groundnut, cowpea                  | smoked dry fish, bissap                                                   | none                                    | no                     |
| <i>PCBBs imported or produced under license of a multinational enterprise</i> |                                |                         |                                        |                                    |                                                                           |                                         |                        |
| Ivory Coast <sup>b</sup>                                                      | Farinor-rice                   | I                       | rice                                   | soybean                            | milk, sugar, flavorings                                                   | extrusion cooking                       | yes                    |
| Brasil <sup>b</sup>                                                           | Régalac-5 cereals              | I                       | maize, rice, wheat, barley, oat flakes | –                                  | milk, sugar, vegetable fat, inulin, vanilla flavor                        | extrusion cooking                       | yes                    |
| Brasil <sup>b</sup>                                                           | Régalac-wheat, milk, 3 fruits  | I                       | wheat                                  | –                                  | milk, sugar, vegetable fat, banana, papaya, apple, inulin, vanilla flavor | extrusion cooking                       | yes                    |
| Ghana <sup>c</sup>                                                            | Cerelac-my 1st wheat cereal    | I                       | wheat                                  | –                                  | milk, sugar, salt, palm olein, maltodextrins, vanillin, bifidus culture   | extrusion cooking                       | yes                    |

| Country of origin  | PCBB commercial name | Flour type <sup>a</sup> | Basic ingredients   |                      |                                                              | Process used to increase energy density | VM Premix <sup>a</sup> |
|--------------------|----------------------|-------------------------|---------------------|----------------------|--------------------------------------------------------------|-----------------------------------------|------------------------|
|                    |                      |                         | Carbohydrate source | Oleaginous & Legumes | Other                                                        |                                         |                        |
| Ghana <sup>d</sup> | Yumvita              | I                       | maize, wheat        | -                    | milk, sugar, maltodextrins, vegetable and fish oil, vanillin | extrusion cooking                       | yes                    |

<sup>a</sup> The flour type and VM Premix addition were determined according to the recommended mode of preparation on the packaging and information collected among producers. VM, Vitamins and Minerals; I, Instant; C, to be cooked; TB, Tom brown; <sup>b</sup> Imported into Senegal; <sup>c</sup> Produced in Ghana by Nestlé - a Swiss multinational company, and imported into Senegal; <sup>d</sup> Produced in Ghana, under license for Promasidor in Switzerland.

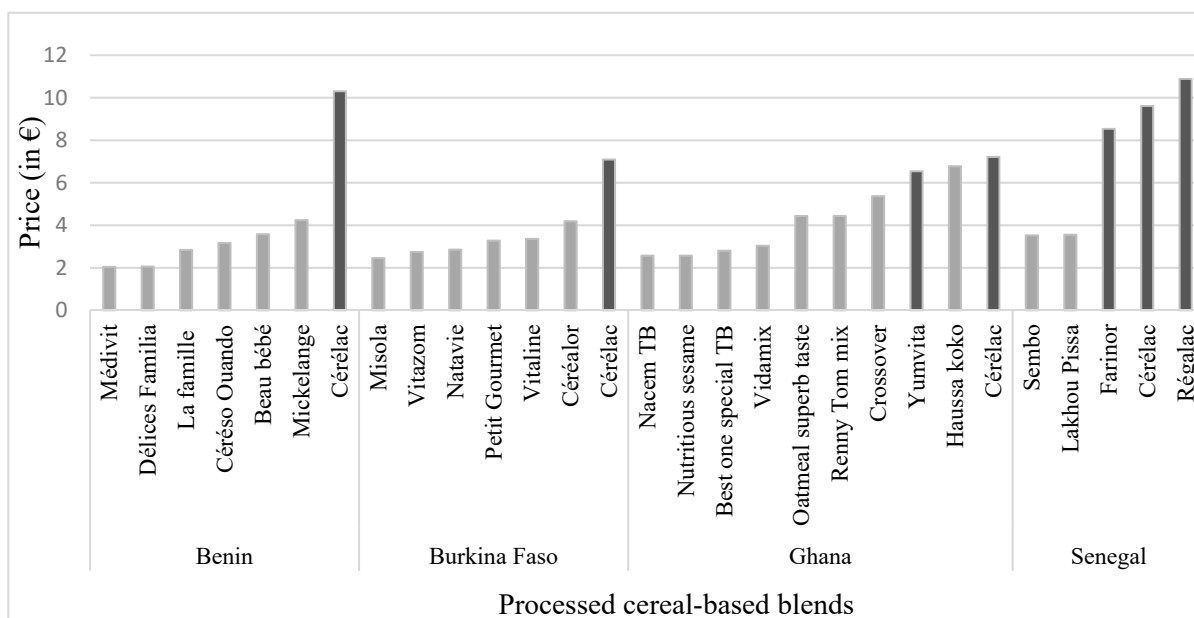

**Figure S1:** Mean prices of PCBBs (in euro/kg) according to the country where they were collected. Prices were collected at POS during the period from April to June 2016. TB : Tom brown. Darker bars are for products that are imported or produced under license from a large multinational enterprise.
